# Supplementary material for: Dual-stimuli-responsive nanoparticles for the co-delivery of small molecules to promote neural differentiation of human iPSCs
Source: Royal Society of Chemistry journal article supplement (doi:10.1039/d4nr04413d), 2024-12-23
Supplement: d4nr04413d1.pdf [file d4nr04413d1.pdf]

### Supplementary Information

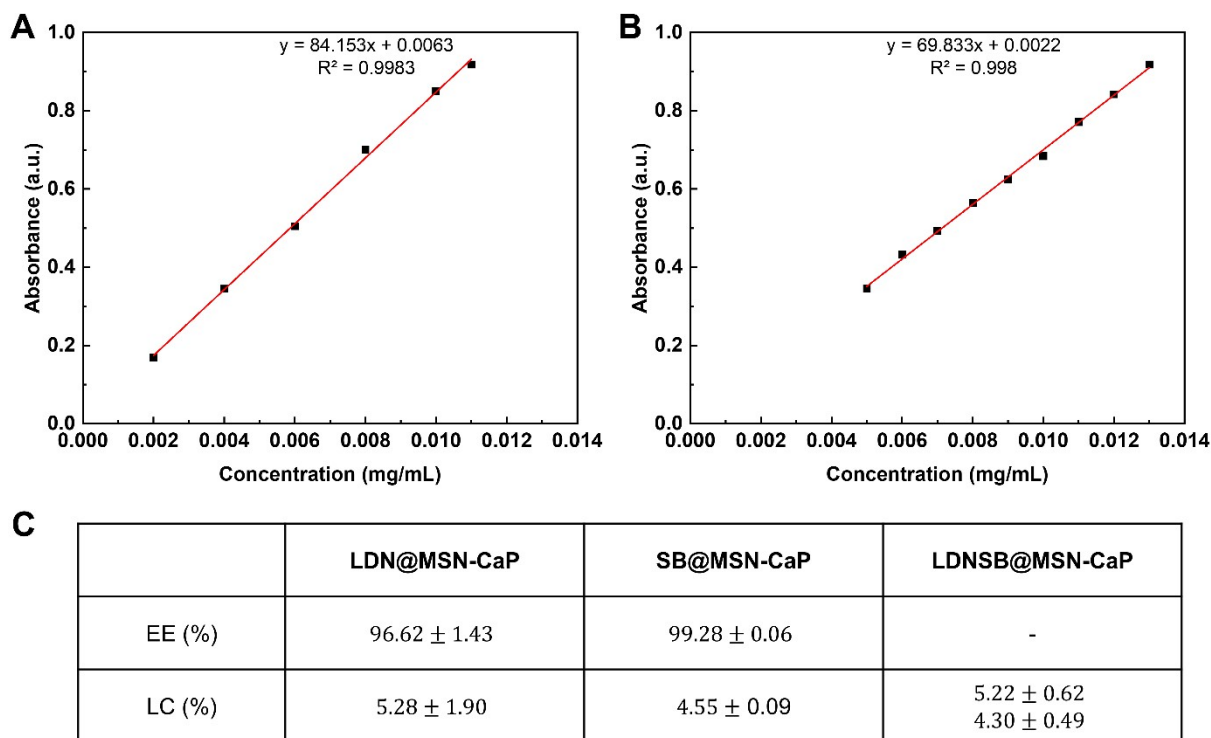

**Figure S1.** Evaluation of small molecules loading capacity. (A-B) Standard curve showing the relationship between absorbance values and concentration of LDN193189 and SB431542. (C) Table of encapsulation efficiency and loading capacity of small molecules encapsulated MSN-CaP nanoparticles.

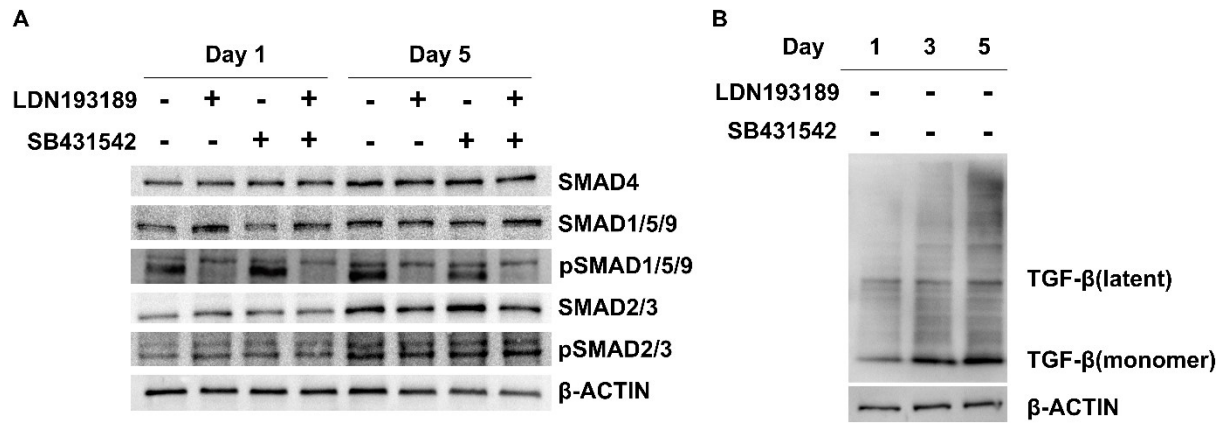

**Figure S2.** Dual SMAD signaling pathway promotes for highly efficient neural induction. (A) Western blot showing the levels of SMAD and pSMAD in iPSCs for 1 and 5 days. (B) Western blot analysis of TGF- $\beta$  protein expression levels in iPSCs. Protein expression levels of TGF- $\beta$  in iPSCs were determined for 1, 3, and 5 days.

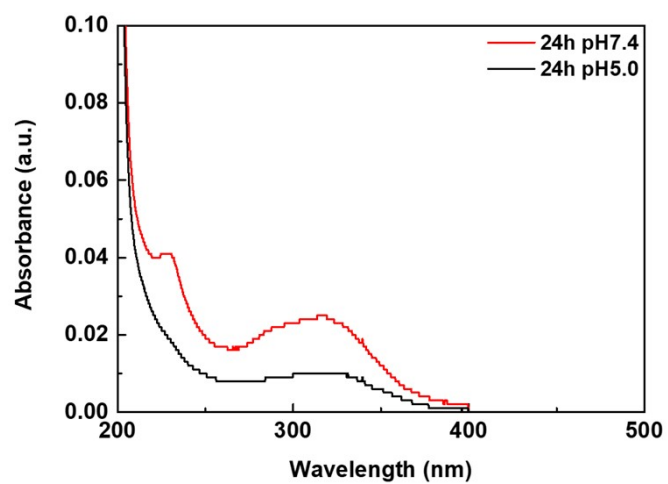

**Figure S3.** UV-VIS spectroscopy spectra of supernatants after 24 hour release test of LDNSB@MSN-CaP at different pH.
